# Supplementary material for: Dynamic Changes of Nitrogen Loads in Source–Sink Landscapes under Urbanization
Source: MDPI journal article supplement (doi:10.3390/land11081371), 2022-08-22
Supplement: s1 [file s1]

# Dynamic Changes of Nitrogen Loads in Source–Sink Landscapes under Urbanization

## The calculation of N load

### ● Cropland land

#### Input

$$\text{Chemical fertilizer } C_{\text{fertilizer}} = F_1 \times R_1 + F_2$$

$$\text{BNF } C_{\text{BNF}} = F_4 \times R_2 + (F_3 - F_4) \times R_3$$

$$\text{Deposition } C_{\text{deposition}} = F_5 \times R_4$$

$$\text{Seed } C_{\text{seed}} = F_6 \times R_5 \times R_6$$

$$\text{Irrigation water } C_{\text{irrigation}} = F_5 \times R_7$$

$$\text{Manure to field } C_{\text{animal manure}} = F_7 \times R_8 \times R_9 / 365 \times R_{10}$$

$$C_{\text{human manure}} = H_{\text{excreta}} \times (1 - R_{21}) \times R_{11} \times (1 - R_{22})$$

$$\text{Crop residue } C_{\text{crop residue}} = F_9 \times (1/R_{12} - 1) \times R_{13} \times R_{14}$$

#### Output

$$\text{Crop harvest } C_{\text{crop harvest}} = F_9 / R_{12} \times R_{23}$$

$$\text{NH}_3 \text{ } C_{\text{NH}_3} = C_{\text{fertilizer}} \times R_{22} + (C_{\text{animal-manure}} + C_{\text{human-manure}}) \times R_{21}$$

$$\text{Surplus } C_{\text{surplus}} = C_{\text{input}} - C_{\text{NH}_3} - C_{\text{crop-harvest}}$$

$$\text{Denitrification (N}_2\text{)} \text{ } C_{\text{denitrification}} = C_{\text{surplus}} \times R_{15}$$

$$\text{Denitrification (N}_2\text{O)} \text{ } C_{\text{denitrification--N}_2\text{O}} = C_{\text{denitrification}} \times R_{18} / (1 + R_{18})$$

$$\text{N}_2\text{O } C_{\text{N}_2\text{O}} = (C_{\text{manure}} + C_{\text{crop residue}}) \times R_{16} + C_{\text{fertilizer}} \times R_{17} + C_{\text{denitrification--N}_2\text{O}}$$

$$\text{Leach } C_{\text{leach}} = C_{\text{surplus}} \times R_{19}$$

$$\text{Runoff } C_{\text{runoff}} = (C_{\text{fertilizer}} + C_{\text{BNF}} + C_{\text{manure}} + C_{\text{crop-residue}}) \times R_{20} \times R_{24}$$

### ● Forest land

#### Input

$$\text{Deposition } GR_{\text{deposition}} = F_{10} \times R_4$$

$$\text{BNF } GR_{\text{BNF-forest}} = F_{10} \times (R_{25} + R_{26})$$

$$\text{Litter } GR_{\text{deposition}} = F_{10} \times R_{27}$$

#### Output

$$\text{Runoff (forest)} \text{ } GR_{\text{runoff-forest}} = GR_{\text{input}} \times R_{28}$$

$$\text{Denitrification (forest)} \text{ } GR_{\text{denitrification}} = F_{10} \times R_{29}$$

### ● Greenbelts and park land

#### Input

$$\text{Fertilizer } GR_{\text{fertilizer}} = F_{11} \times R_{30}$$

$$\text{Pet-excreta } GR_{\text{pet-excreta}} = F_{12} / R_{31} \times [(R_{32} \times R_{33} \times R_{34}) / R_{35} + (R_{36} \times R_{37} \times R_{38})]$$

$$\text{Deposition } GR_{\text{deposition}} = F_{11} \times R_4$$

$$\text{BNF (lawn)} \quad GR_{\text{BNF-lawn}} = F_{11} \times R_{39}$$

$$\text{Irrigation } GR_{\text{deposition}} = F_{11} \times R_{40} \times R_{41}$$

### Output

$$\text{Runoff(lawn)} \quad GR_{\text{runoff-lawn}} = GR_{\text{fertilizer}} \times R_{42} + GR_{\text{pet-excreta}} \times R_{43}$$

$$\text{Leach } GR_{\text{leach}} = GR_{\text{input}} \times R_{44}$$

$$NH_3 \quad GR_{NH_3} = GR_{\text{fertilizer}} \times R_{45} + GR_{\text{pet}} \times R_{46}$$

$$N_2O \quad GR_{N_2O-lawn} = GR_{\text{fertilizer}} \times R_{47}$$

$$N_2 \quad GR_{N_2-lawn} = GR_{\text{fertilizer}} \times R_{48} + GR_{\text{pet-excreta}} \times R_{49}$$

### ● Residential land

#### Output

$$\text{Sewage } R_{\text{sewage}} = F_{13} \times R_{50} \times R_{51}$$

$$\text{Garbage } R_{\text{garbage}} = F_{14} \times R_{52} \times R_{53}$$

$N_2O$ : The  $N_2O$  emission mainly come from energy consumption of residents, so the calculation refers to equation of traffic land.

$NO_x$ : The  $NO_x$  emission mainly come from energy consumption of residents, so the calculation refers to equation of traffic land.

### ● Traffic land

#### Output

$$NO_x \quad E_{NO_x} = (1 - R_{54}) \times F_{15} \times R_{55}$$

$$N_2O \quad E_{N_2O} = F_{15} \times R_{56} \times R_{57}$$

$$NH_3 \quad E_{NH_3} = F_{16} \times R_{58}$$

### ● Industrial land

$$I_{\text{output}} = I_{NO_x} + I_{N_2O} + I_{\text{sewage}}$$

These data were taken directly from local statistical offices.

**Table S1.** The parameters of N load calculation.

| NO.       | Item Description                          | Unit  | Value                                                                                   | Ref |
|-----------|-------------------------------------------|-------|-----------------------------------------------------------------------------------------|-----|
| <b>R1</b> | N content of compound fertilizer          | %     | 33.3                                                                                    | [2] |
| <b>R2</b> | Symbiotic N-fixation rate of cropland     | kg/ha | Legumes:105; peanut:112                                                                 | [3] |
| <b>R3</b> | Non-symbiotic N-fixation rate of cropland | kg/ha | 18.75                                                                                   | [3] |
| <b>R4</b> | N deposition rate                         | kg/ha | 30.15                                                                                   | [4] |
| <b>R5</b> | Seed rate                                 | kg/ha | Rice:37.5; soybean:76.05; potatoes:225;peanut:285;rape-seed:1;sesame:5;vegetables:15.38 | [5] |

|            |                                                                  |                                        |                                                                                                                                  |      |
|------------|------------------------------------------------------------------|----------------------------------------|----------------------------------------------------------------------------------------------------------------------------------|------|
| <b>R6</b>  | N content of seed                                                | %                                      | Cereal:1.3;potatoes:0.3;soy-bean:4.2;peanut:4.4;rape-seed:4;sesame:3.49;sugar-cane:0.13;vegetables:0.2;fu-rits:0.21              | [5]  |
| <b>R7</b>  | Irrigation rate                                                  | kg/ha                                  | 26.3                                                                                                                             | [6]  |
| <b>R8</b>  | N excreta rate for animals                                       | kg/cap                                 | Pig:8; cattle:40; sheep:5; rabbit:0.4; poultry:0.3                                                                               | [7]  |
| <b>R9</b>  | Feeding period of livestock                                      | day                                    | Pig:199;cat-tle:365;sheep:365;rabbit:120; poultry:55                                                                             | [7]  |
| <b>R10</b> | Ratio of animal excreta back to field                            | %                                      | Pig:60;cattle:77.7;sheep:70; rabbit:35; poultry:39                                                                               | [7]  |
| <b>R11</b> | Ratio of human excreta back to field                             | %                                      | urban :10; rural :30                                                                                                             | [7]  |
| <b>R12</b> | Harvest Index of crops                                           |                                        | Cereal:0.53; potatoes:0.66; soy-bean:0.5; peanut:0.55; rape-seed:0.28; sesame:0.37; sugar-cane:0.67;                             | [7]  |
| <b>R13</b> | N content of straws                                              | %                                      | Cereal:0.91; potatoes:2.51; soy-bean:2.1; peanut:1.82; rape-seed:0.87; sesame:1.31; sugar-cane:1.1;                              | [7]  |
| <b>R14</b> | Ratio of straw back to field                                     | %                                      | Cereal:41.7; potatoes:50; soy-bean:16.8; peanut:26; rape-seed:47.6; sesame:0; sugar-cane:10;                                     | [7]  |
| <b>R15</b> | Denitrification percentage (N <sub>2</sub> )                     | %                                      | 72.5                                                                                                                             | [8]  |
| <b>R16</b> | Direct N <sub>2</sub> O emission factor from chemical fertilizer | %                                      | 0.86                                                                                                                             | [9]  |
| <b>R17</b> | Direct N <sub>2</sub> O emission factor from organic fertilizer  |                                        | 0.01                                                                                                                             | [10] |
| <b>R18</b> | N <sub>2</sub> O-yield ratio of denitrification                  | Kg/N <sub>2</sub>                      | 0.039                                                                                                                            | [11] |
| <b>R19</b> | Leaching ratio of applied N                                      | %                                      | 12.5                                                                                                                             | [12] |
| <b>R20</b> | Runoff ratio of applied N                                        | %                                      | 16.7                                                                                                                             | [8]  |
| <b>R21</b> | Volatilization coefficient of excreta                            | %                                      | Pig:19; cattle:17; sheep:25; rabbit:54; poultry:22; human:25                                                                     | [13] |
| <b>R22</b> | Volatilization coefficient of chemical fertilizer                | %                                      | 20                                                                                                                               | [14] |
| <b>R23</b> | N content of crop                                                | %                                      | Cereal:1.12; potatoes:1.04; soy-bean:3.15; peanut:3.25; rape-seed:1.75; sesame:2.12; sugar-cane:0.37;vegetables:0.3;fu-rits:0.19 | [15] |
| <b>R24</b> | The retention coefficient of N runoff                            | %                                      | 42.5%                                                                                                                            | [16] |
| <b>R25</b> | Symbiotic N-fixation rate of forest                              | kg N ha <sup>-1</sup> yr <sup>-1</sup> | 5                                                                                                                                | [19] |
| <b>R26</b> | Non-symbiotic N-fixation rate of forest                          | kg N ha <sup>-1</sup> yr <sup>-1</sup> | 12                                                                                                                               | [19] |
| <b>R27</b> | Litter return to forest                                          | kg N ha <sup>-1</sup> yr <sup>-1</sup> | 47.63                                                                                                                            | [17] |

|            |                                                            |                                        |                                                                                                   |              |
|------------|------------------------------------------------------------|----------------------------------------|---------------------------------------------------------------------------------------------------|--------------|
| <b>R28</b> | Rate of N runoff in forest                                 | %                                      | 22                                                                                                | [19]         |
| <b>R29</b> | Factor of denitrification in forest                        | kg N ha <sup>-1</sup> yr <sup>-1</sup> | 3.3                                                                                               | [18]         |
| <b>R30</b> | Fertilizer rate of greenbelts and park                     | kg N ha <sup>-1</sup> yr <sup>-1</sup> | 300                                                                                               | [20]         |
| <b>R31</b> | The percentage of people who own pets                      |                                        | 1/13                                                                                              | Field survey |
| <b>R32</b> | The proportion of the cat                                  | %                                      | 30.8                                                                                              | [21]         |
| <b>R33</b> | The weight of cat                                          | kg                                     | 3.6                                                                                               | [22]         |
| <b>R34</b> | The per kilogram of cat needs nitrogen for per day         | g/kg                                   | 0.88                                                                                              | [22]         |
| <b>R35</b> | The landfill percentage of pet excretion                   | %                                      | 50                                                                                                | [22]         |
| <b>R36</b> | The proportion of the dog                                  | %                                      | 69.2                                                                                              | [21]         |
| <b>R37</b> | The weight of dog                                          | kg                                     | 20                                                                                                | [22]         |
| <b>R38</b> | The per kilogram of dog needs nitrogen for per day         | g/kg                                   | 0.56                                                                                              | [22]         |
| <b>R39</b> | Nitrogen fixation rate of lawn                             | kg N ha <sup>-1</sup> yr <sup>-1</sup> | 18                                                                                                | [22]         |
| <b>R40</b> | irrigation water volume                                    | L/ha                                   | 10500000                                                                                          | Field survey |
| <b>R41</b> | nitrogen concentration of irrigation water                 | mg/L                                   | 20                                                                                                | Field survey |
| <b>R42</b> | Rate of fertilizer nitrogen runoff in greenbelts and park  | %                                      | 11                                                                                                | [19]         |
| <b>R43</b> | Rate of manure nitrogen runoff in greenbelts and park      | %                                      | 5                                                                                                 | [19]         |
| <b>R44</b> | Factor of leaching from greenbelts and park                | %                                      | 3.2                                                                                               | [23]         |
| <b>R45</b> | Factor of NH <sub>3</sub> emission from fertilizer         | %                                      | 11.8                                                                                              | [19]         |
| <b>R46</b> | Factor of NH <sub>3</sub> emission from manure             | %                                      | 23                                                                                                | [19]         |
| <b>R47</b> | Factor of N <sub>2</sub> O emission in greenbelts and park | %                                      | 1.1                                                                                               | [19]         |
| <b>R48</b> | Factor of N <sub>2</sub> from fertilizer                   | %                                      | 25.3                                                                                              | [24]         |
| <b>R49</b> | Factor of N <sub>2</sub> from manure                       | %                                      | 15                                                                                                | [24]         |
| <b>R50</b> | nitrogen concentration of sewage                           | kg/t                                   | 0.0468                                                                                            | [25]         |
| <b>R51</b> | treatment rate of sewage                                   | %                                      | 94                                                                                                | Field survey |
| <b>R52</b> | The percentage of various types of garbage                 | %                                      | Foodwaste:51.5; papers:9.3; plastics:15; textile:5.1 Woods:2; glasses:2.9; metals:0.7; dust:13.5  | [26]         |
| <b>R53</b> | The N content of garbage                                   | %                                      | Foodwaste:2.6; papers:0.3; plastics:0.5; textile:10 Woods:0.3; glasses:0.1; metals:0.1; dust:0.98 | [26]         |
| <b>R54</b> | Removal rate of NO <sub>x</sub>                            | %                                      | 30                                                                                                | [27]         |

|            |                                                            |                          |          |      |
|------------|------------------------------------------------------------|--------------------------|----------|------|
| <b>R55</b> | Factor of energy sector NO <sub>x</sub> -N emission        | Kg/t                     | TableS3  | [27] |
| <b>R56</b> | Factor of energy sector N <sub>2</sub> O emission          | kg/TJ                    | TableS4  | [28] |
| <b>R57</b> | Conversion of fuel calorific value                         | kJ/kg; kJ/m <sup>3</sup> | TablesS5 | [28] |
| <b>R58</b> | Factor of vehicle-miles of travel NH <sub>3</sub> emission | g/km                     | TableS6  | [29] |

Table S2. The activity data of N load calculation.

| <i>No.</i> | Item Description                      | Unit           | Ref |
|------------|---------------------------------------|----------------|-----|
| <b>F1</b>  | Consumption of nitrogenous fertilizer | T              | [1] |
| <b>F2</b>  | Consumption of compound fertilizer    | T              | [1] |
| <b>F3</b>  | Total sown area                       | ha             | [1] |
| <b>F4</b>  | Sown area of legume crops             | ha             | [1] |
| <b>F5</b>  | Area of cropland                      | ha             | [1] |
| <b>F6</b>  | Sown area of different crops          | ha             | [1] |
| <b>F7</b>  | Number of livestock and poultry       |                | [1] |
| <b>F8</b>  | Population (count)                    |                | [1] |
| <b>F9</b>  | Yield of grain crops                  | T              | [1] |
| <b>F10</b> | The area of forest                    | ha             | [1] |
| <b>F11</b> | The area of greenbelts and park       | ha             | [1] |
| <b>F12</b> | The population of city                |                | [1] |
| <b>F13</b> | Volume of sewage                      | m <sup>3</sup> | [1] |
| <b>F14</b> | Amount of household garbage           | T              | [1] |
| <b>F15</b> | Energy consumption of various sector  | T              | [1] |
| <b>F16</b> | The amount of various vehicle         |                | [1] |

Table S3. Factor of energy sector NO<sub>x</sub> emission(kg/t).

| Sector         | Emission source | Coal | Coke | Crude oil | Gasoline | Kerosene | Diesel | Fuel oil | Natural gas |
|----------------|-----------------|------|------|-----------|----------|----------|--------|----------|-------------|
| Energy         | Electric        | 9.95 |      | 7.24      | 16.7     | 21.2     | 7.4    | 10.06    | 41          |
|                | Manufacture     | 0.75 | 0.9  | 2.19      |          |          | 9.62   | 5.84     |             |
|                | Oil refining    | 0.37 |      | 0.24      |          |          |        |          |             |
| Construction   |                 | 7.5  | 9    |           | 16.7     | 7.46     | 9.62   | 5.84     | 20.9        |
| Transportation | Highway         |      |      |           | 21.2     | 27.4     | 27.4   | 27.4     |             |
|                | Railway         | 7.5  | 9    |           |          |          | 54.1   | 54.1     |             |
|                | others          | 7.5  | 9    | 5.09      | 16.7     | 27.4     | 36.3   | 36.3     | 20.9        |
| Consumption    |                 | 1.88 | 2.25 | 1.7       | 16.7     | 2.49     | 3.21   | 1.95     | 14.6        |
| Commerce       |                 | 3.75 | 4.5  | 3.05      | 16.7     | 4.48     | 5.77   | 3.5      | 14.6        |
| Agriculture    |                 | 3    |      |           | 6.7      |          | 9.4    |          |             |
| others         |                 | 3.75 | 4.5  | 3.05      | 16.7     | 4.48     | 5.77   | 3.5      | 14.6        |

Table S4. Factor of energy sector N<sub>2</sub>O emission (kg/TJ) .

| Sector         | Coal | Coke | Crude oil | Gasoline | Kerosene | Diesels | Natural gas |
|----------------|------|------|-----------|----------|----------|---------|-------------|
| Consumption    | 1.5  | 1.5  | 0.6       | 0.6      | 0.6      | 0.6     | 0.1         |
| Transportation |      |      |           | 3.2      | 2        | 3.9     | 0.1         |
| Agriculture    | 1.5  | 1.5  | 0.6       | 0.6      | 0.6      | 0.6     | 0.1         |
| Construction   | 1.5  | 1.5  | 0.6       | 0.6      | 0.6      | 0.6     | 0.1         |
| Commerce       | 1.5  | 1.5  | 0.6       | 0.6      | 0.6      | 0.6     | 0.1         |

**Table S5.** Conversion of fuel calorific value (kJ/kg; kJ/m<sup>3</sup>).

| Item        | Lower calorific value |
|-------------|-----------------------|
| Coal        | 20908                 |
| Coke        | 28435                 |
| Coal gas    | 16726                 |
| Crude oil   | 41816                 |
| Gasoline    | 43070                 |
| Kerosene    | 43070                 |
| Diesel      | 42652                 |
| Fuel oil    | 41816                 |
| Natural gas | 38931                 |

**Table S6.** Factor of vehicle-miles of travel NH<sub>3</sub> emission.

|                       | Factor of NH <sub>3</sub> emission g/km |
|-----------------------|-----------------------------------------|
| Heavy-duty car        | 0.028                                   |
| light car             | 0.026                                   |
| Heavy-duty diesel car | 0.017                                   |
| Light diesel car      | 0.017                                   |

## References

1. XSB (Xiamen Statistics Bureau), NBSC (National Bureau of Statistics of China), 2006, 2011 2016. Xiamen Statistics Yearbook. China Statistics Press, Beijing. (In Chinese)
2. Ti C, Pan J, Xia Y, et al. 2012. A nitrogen budget of mainland China with spatial and temporal variation. *Biogeochemistry*, 108(1-3): 381-394.
3. Yan W, Yin C, Zhang S. 1999. Nutrient budgets and biogeochemistry in an experimental agricultural watershed in Southeastern China. *Biogeochemistry*, 45(1): 1-19.
4. Chen N, Hong H, Huang Q, et al. 2011. Atmospheric nitrogen deposition and its long-term dynamics in a southeast China coastal area. *Journal of environmental management*, 92(6): 1663-1667.
5. Zhou T, Wang Y P, Wang F, et al. 2014. Analysis of the nitrogen footprint of agriculture in Guangdong. *China Environmental Science*, 34(9): 2430-2438.
6. Gao L W. 2009. Study on evaluation of nitrogen nutrient flow in food chain—a case study of Huang Hai region. Hebei Agriculture University. (In Chinese)
7. Yanmin Li, Shenghui Cui, Bing Gao, Jianxiong Tang, Wei Huang, Yunfeng Huang. 2020. Modeling nitrogen flow in a coastal city—A case study of Xiamen in 2015, *Science of the Total Environment*, 735
8. Ma L, Velthof G L., Wang F.H., Qin W., Zhang W.F., Zhang F.S., Oenema C. 2012. Nitrogen and phosphorus use efficiencies and losses in the food chain in China at regional scales in 1980 and 2005. *Science of Total Environment*, 434:51-61
9. Zheng X H, Han S H, Huang Y, Wang Y S, Wang M X. 2014. Re-quantifying the emission factors based on field measurements and estimating the direct N<sub>2</sub>O emission from Chinese croplands. *Global Biogeochemical Cycle*, 18(2):GB2018
10. Intergovernmental Panel on Climate Change (2007) IPCC Fourth Assessment Report: Climate change 2007(AR4). Available at <https://www.ipcc.ch/report/ar4/syr/>.
11. Schlesinger W H. 2008. On the fate of anthropogenic nitrogen. *Proceedings of the National Academy of Sciences of the United States of America*. 106:203-208
12. Huang W, Gao B, Huang Y F, Zhang Z L, Xu S, Xu L L. 2019. Transforming nitrogen management of urban food system in a food-sink city. *Journal of Environment Management*, 249: 109180
13. Moller D, Schieferdecker H. 1989. Ammonia emission and deposition of NH<sub>4</sub> in the G.D.R. *Atmospheric Environment*. 23(6):1187-1193
14. Cai B F. 2009. City's greenhouse gas (GHG) emission inventory research. Beijing: Chemical Industry Press (In Chinese).
15. Ma L, Ma W Q, Velthof GL, Wang F H, Qin W, Zhang F S, Oenema O. 2010. Modeling nutrient flows in the food chain of China. *Journal of Environmental quality*. 39(4):1279-1289
16. Min J, Shi W M. 2018. Nitrogen discharge pathways in vegetable production as non-point sources of pollution and measures to control it. *Science of Total Environment*, 613:123-130
17. Liu Y M. 1984. Terrestrial nitrogen cycles. *Land ecological translation*, 4:32-41
18. Xin J B, Zhang F S, You X L. 2007. Nitrogen balance of natural forest ecosystem in China, *Acta ECOLOGICA SINICA*, 27(8):3257-3267 (in Chinese)
19. Townsend-Small A, Pataki D E, Czimczik C I, et al. 2011. Nitrous oxide emissions and isotopic composition in urban and agricultural systems in southern California. *Journal of Geophysical Research*, 116, G01013

20. Zhang R.L. 2002. Research advances on fertilizer application to lawn. Chinese journal of tropical agriculture, 22(4):77-81
21. Research report on market investigation and development prospect of Chinese pet industry. 2014-2019. <http://www.cninfo360.com/>
22. Gu B, Chang J, Ge Y, Ge H, Yuan C., et al. 2009. Anthropogenic modification of the nitrogen cycling within the Greater Hangzhou Area system, China. Ecological Applications, 19(4):974-988
23. Gu B J., Ju X T., Chang J., et al. 2015. Integrated reactive nitrogen budgets and future trends in China. Proceedings of the National Academy of Sciences of the United States of America, 112(28):8792-8797
24. Xing G.X., Zhu Z.L. 2000. An assessment of N loss from agricultural fields to the environment in China. Nutrient Cycling in Agroecosystems. 57:67-73
25. Ren Y. 2015. Study on comprehensive evaluation and dynamic optimization of wastewater treatment system in Xiamen. Xiamen university. China. (In Chinese)
26. Xian C F., Ouyang Z Y, Lu F, Xiao Y, Li Y M. 2016. Quantitative evaluation of reactive nitrogen emissions with urbanization: a case study in Beijing megacity, China. Environment Science Pollution Research. 23:17689-17701
27. Shi Y L, Cui S H, Xu S, Lin J Y. 2014. Nitrogen oxide emission in energy consumption in China from a consumption-based perspective. Acta Scientiae Circumstantiae, 34(10):2684-2692 (In Chinese)
28. CESB. China energy statistics yearbook. China energy statistics bureau. China
29. Zhang Q H, Gao B, Huang W, Yan X M, Cui S H. 2017. Analysis of Anthropogenic Reactive Nitrogen Emissions and Its Features on Prefecture-level City in Fujian Province, Environmental Science, 38(9):3610-3619 (in Chinese)
